# Supplementary material for: Allosteric modulation of the sarcoplasmic reticulum Ca2+ATPase by thapsigarginviadecoupling of functional motions
Source: Royal Society of Chemistry journal article supplement (doi:10.1039/c9cp04736k), 2019-01-01
Supplement: c9cp04736k1.pdf [file c9cp04736k1.pdf]

# Allosteric Modulation of the Sarcoplasmic Reticulum Ca<sup>2+</sup> ATPase by Thapsigargin via Decoupling of Functional Motions

Received 00th January 20xx,  
Accepted 00th January 20xx

Noureldin Saleh,<sup>a</sup> Yong Wang,<sup>a</sup> Poul Nissen<sup>b</sup> and Kresten Lindorff-Larsen<sup>\*a</sup>

DOI: 10.1039/x0xx00000x

## Table of contents

|                       |   |
|-----------------------|---|
| Supplementary methods | 1 |
| Fig. S1               | 2 |
| Fig. S2               | 3 |
| Fig. S3               | 3 |
| Fig. S4               | 4 |
| Fig. S5               | 4 |
| Reference list        | 5 |

## Supplementary Methods

### Model setup of SERCA

This study included models based on three different states (PDB accession codes in parenthesis): [Ca<sub>2</sub>]E1-ATP<sub>4</sub>-ADP (5XA8), (Ca<sub>2</sub>)E1 (5XA7), E2-TG (5XAB) and the [Ca<sub>2</sub>]E1P-ADP 4G insertion mutant of SERCA that we built using the MODELLER interface of UCSF Chimera (based on 5XA8).<sup>1-3</sup> We modelled TG-bound structures for the [Ca<sub>2</sub>]E1P-ADP-TG (5XA8), (Ca<sub>2</sub>)E1-TG (5XA7) and the [Ca<sub>2</sub>]E1P-ADP-TG 4G insertion mutant of SERCA by aligning the structure of the TG-bound E2 state (5XAB) to the original model of each of the aforementioned states based on TG's binding pocket, followed by transferring the TG molecule and stepwise minimization of the resulting structures — no major clashes were found between the TG molecule and the different states of SERCA. We also performed simulations for Ca<sup>2+</sup>-free E1-TG after removing the Ca<sup>2+</sup> from (Ca<sub>2</sub>)E1-TG and a TG-free E2 state after removing TG from the E2-TG model.

The protonation states for the ionizable residues were as follows (i) E908 was protonated for our E1 and E1P models and (ii) residues E309, E771 and E908 were protonated for the E2 models. Protonation states were assigned on the basis of previous studies<sup>4-6</sup> and also verified using PROPKA3<sup>7</sup>. A double negatively-charged phosphorylation was modelled at D351 in the phosphorylated E1P states using previously derived

parameters<sup>6</sup> instead of the AlF<sub>4</sub> found in the crystal structures. The necessary cofactors for each state and co-crystallized water and ions were kept in the models.

### General setup of MD simulations

SERCA models were inserted into a 1-palmitoyl-2-oleoylphosphatidylcholine (POPC) membrane bilayer according to the orientation in the OPM database.<sup>8</sup> Parameters for the simulations were generated using the CHARMM-GUI web interface,<sup>9-11</sup> using the CHARMM36m force field<sup>12</sup> with CGenFF<sup>13</sup> for TG with partial charges generated from AM1-BCC calculations.<sup>14</sup> The appropriate number of potassium and chloride ions was added to the systems to a concentration of ~150mM. Particle-mesh Ewald was used to treat electrostatic interactions using a cut-off distance of 10 Å.<sup>15</sup> The resulting system was geometry-optimized and then equilibrated for 2 ns in the NVT and NPT ensembles respectively using restraints on the heavy atoms that were tapered down during the equilibration followed by a production run in the NPT ensemble at T=300 K using Nose-Hoover thermostat<sup>16</sup> and constant pressure using the Parrinello-Rahman barostat.<sup>17</sup> All hydrogen bonds were constrained using the LINCS algorithm<sup>18</sup> and time steps was set to 2fs. All simulations used the TIP3P water model and a box of 130×130×160 Å<sup>3</sup>. System orientation and distance between protein and the box edge is illustrated in Figure 1. Simulations were performed using either GROMACS 5.0.4 or Gromacs2016.3<sup>19</sup> and Table S1 provides an overview of

| # | State                     | PDB ID | Construct | TG  | Time (μs) | #Rep |
|---|---------------------------|--------|-----------|-----|-----------|------|
| 1 | [Ca <sub>2</sub> ]E1P-ADP | 5XA8   | WT        | Yes | 1.8μs     | 1    |
| 2 | [Ca <sub>2</sub> ]E1P-ADP | 5XA8   | 4G mutant | Yes | 1.9μs     | 1    |
| 3 | [Ca <sub>2</sub> ]E1P-ADP | 5XA8   | WT        | No  | 1.5μs     | 1    |
| 4 | [Ca <sub>2</sub> ]E1P-ADP | 5XA8   | 4G mutant | No  | 1.5μs     | 1    |
| 5 | (Ca <sub>2</sub> )E1      | 5XA7   | WT        | No  | 1μs       | 1    |
| 6 | (Ca <sub>2</sub> )E1      | 5XA7   | WT        | Yes | 1μs×3     | 3    |
| 7 | E2                        | 5XAB   | WT        | No  | 0.9μs     | 1    |
| 8 | E1                        | 5XA7   | WT        | Yes | 0.99μs    | 1    |

**Table S1.** Overview of simulations performed and discussed.

<sup>a</sup> Dr. N. Saleh, Dr. Y. Wang and Prof. Dr. K. Lindorff-Larsen  
Linderstrøm-Lang Centre for Protein Science, Dept. of Biology, University of  
Copenhagen, Copenhagen, Denmark  
E-mail: lindorff@bio.ku.dk

<sup>b</sup> Prof. Dr. P. Nissen- Danish Research Institute of Translational Neuroscience –  
DANDRITE and Department of Molecular Biology and Genetics, Aarhus University,  
Aarhus, Denmark

## Supplementary figures

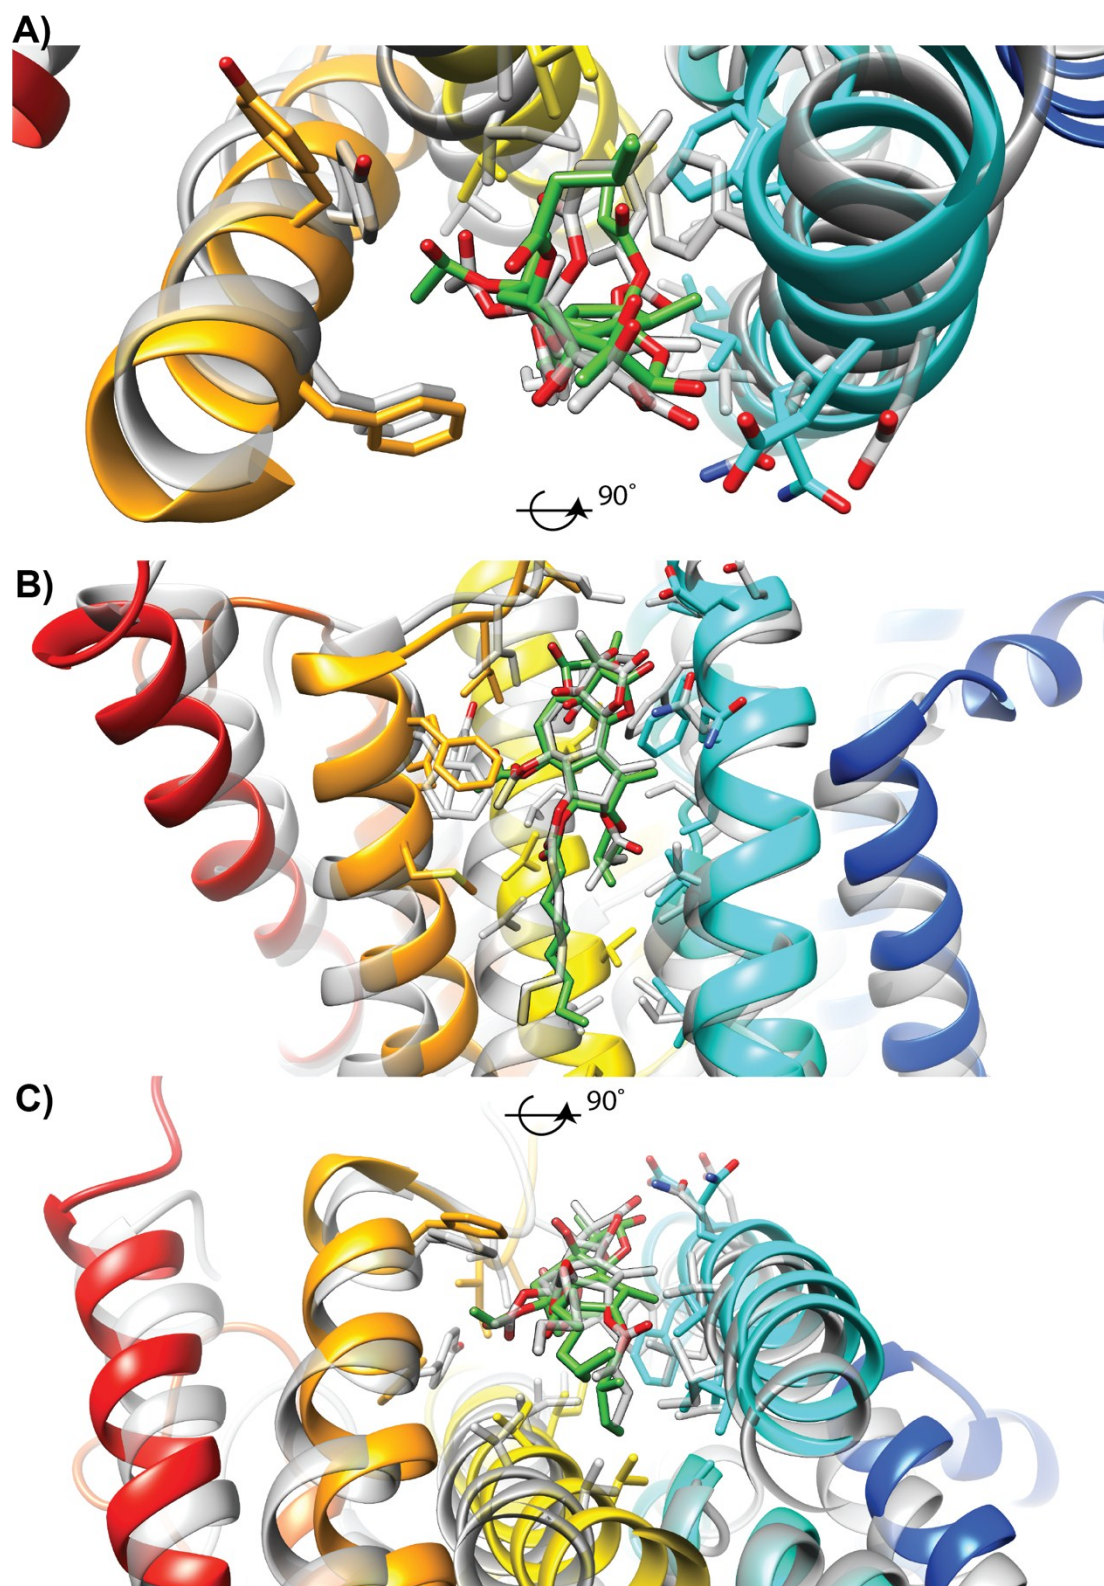

**Figure S1.** Comparison of the E2-TG binding pocket and the TG binding pocket in the  $[Ca_2]E1P$ -ADP structure after minimization from three different perspectives.

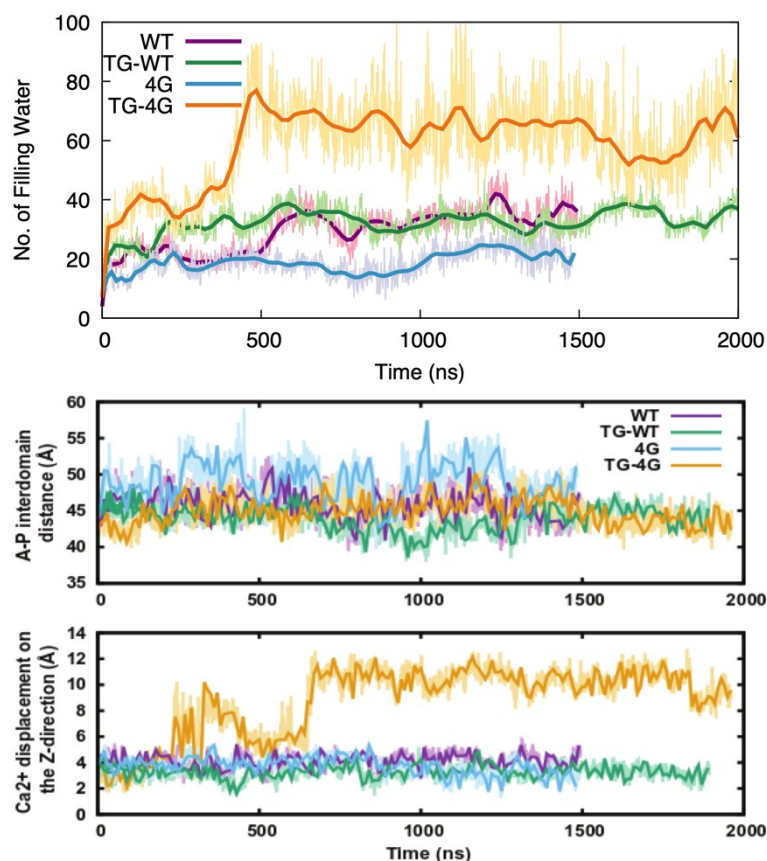

**Figure S2.** Comparison between the behaviour of the phosphorylated  $[\text{Ca}_2]\text{E1P-ADP}$  simulations. **Upper panel:** Number of water within the transmembrane bundle. **Middle panel:** Inter-domain distances between cytoplasmic A-P domains. **Lower panel:** Z-component of distance between the  $\text{Ca}^{2+}$  ion and the Cy atom in E308.

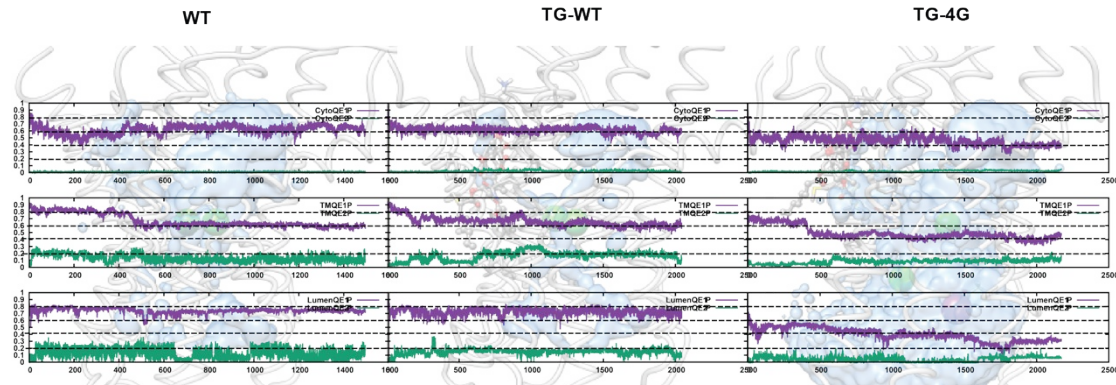

**Figure S3.** Time evolution for the fraction of E1P/E2P specific native contacts formed during the WT, TG-WT and TG-4G simulations. A state-specific contact is defined as a contact that is present in one of the two states and is broken in the other state by a ratio 1:1.4 as described in references <sup>20-22</sup>.

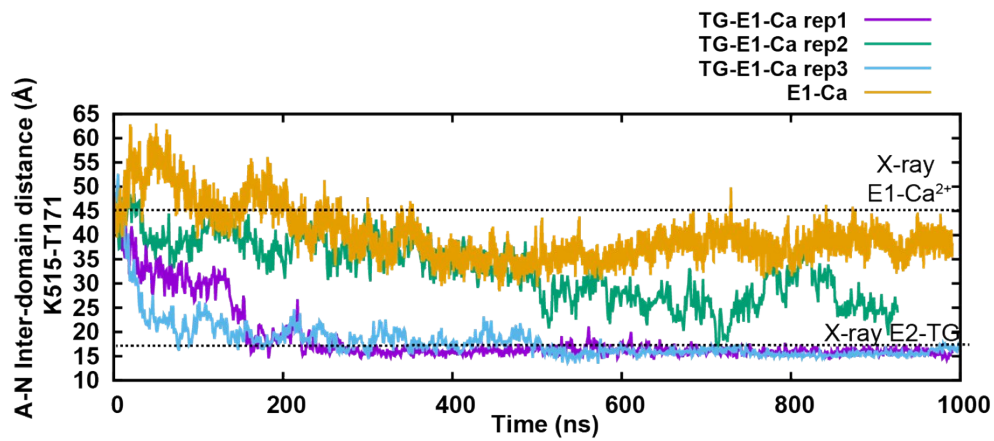

Figure S4. Time evolution of the A-N inter-domain distance during the  $(Ca_2)E1$ -TG and the  $(Ca_2)E1$  simulations.

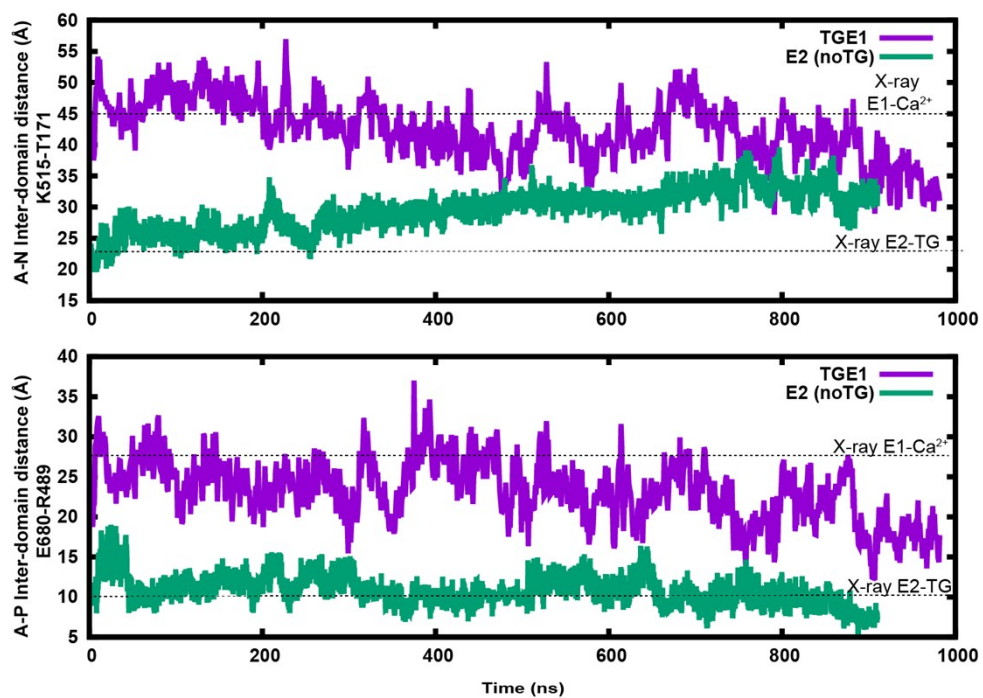

Figure S5. Upper panel: A-N inter-domain distance. Lower panel: P-N inter-domain distance evolution during the TG-bound E1 and the TG-free E2 simulations.

## Notes and references

1. N. Eswar, D. Eramian, B. Webb, M. Y. Shen and A. Sali, *Methods in molecular biology*, 2008, **426**, 145-159.
2. E. F. Pettersen, T. D. Goddard, C. C. Huang, G. S. Couch, D. M. Greenblatt, E. C. Meng and T. E. Ferrin, *J Comput Chem*, 2004, **25**, 1605-1612.
3. Y. Norimatsu, K. Hasegawa, N. Shimizu and C. Toyoshima, *Nature*, 2017, **545**, 193-198.
4. J. M. Autry, D. D. Thomas and L. M. Espinoza-Fonseca, *Biochemistry*, 2016, **55**, 6083-6086.
5. L. M. Espinoza-Fonseca, J. M. Autry, G. L. Ramirez-Salinas and D. D. Thomas, *Biophys J*, 2015, **108**, 1697-1708.
6. A. Das, H. Rui, R. Nakamoto and B. Roux, *J Mol Biol*, 2017, **429**, 647-666.
7. M. H. Olsson, C. R. Sondergaard, M. Rostkowski and J. H. Jensen, *J Chem Theory Comput*, 2011, **7**, 525-537.
8. M. A. Lomize, A. L. Lomize, I. D. Pogozheva and H. I. Mosberg, *Bioinformatics*, 2006, **22**, 623-625.
9. J. Lee, X. Cheng, J. M. Swails, M. S. Yeom, P. K. Eastman, J. A. Lemkul, S. Wei, J. Buckner, J. C. Jeong, Y. Qi, S. Jo, V. S. Pande, D. A. Case, C. L. Brooks, 3rd, A. D. MacKerell, Jr., J. B. Klauda and W. Im, *J Chem Theory Comput*, 2016, **12**, 405-413.
10. E. L. Wu, X. Cheng, S. Jo, H. Rui, K. C. Song, E. M. Davila-Contreras, Y. Qi, J. Lee, V. Monje-Galvan, R. M. Venable, J. B. Klauda and W. Im, *J Comput Chem*, 2014, **35**, 1997-2004.
11. S. Jo, T. Kim, V. G. Iyer and W. Im, *J Comput Chem*, 2008, **29**, 1859-1865.
12. J. Huang, S. Rauscher, G. Nawrocki, T. Ran, M. Feig, B. L. de Groot, H. Grubmuller and A. D. MacKerell, Jr., *Nature methods*, 2017, **14**, 71-73.
13. K. Vanommeslaeghe, E. Hatcher, C. Acharya, S. Kundu, S. Zhong, J. Shim, E. Darian, O. Guvench, P. Lopes, I. Vorobyov and A. D. Mackerell, Jr., *J Comput Chem*, 2010, **31**, 671-690.
14. A. Jakalian, D. B. Jack and C. I. Bayly, *J Comput Chem*, 2002, **23**, 1623-1641.
15. T. Darden, D. York and L. Pedersen, *Journal of Chemical Physics*, 1993, **98**, 10089-10092.
16. A. Cheng and K. M. Merz, *The Journal of Physical Chemistry*, 1996, **100**, 1927-1937.
17. M. Parrinello and A. Rahman, *Journal of Applied Physics*, 1981, **52**, 7182-7190.
18. B. Hess, H. Bekker, H. J. C. Berendsen and J. G. E. M. Fraaije, *J Comput Chem*, 1997, **18**, 1463-1472.
19. S. Pronk, S. Pall, R. Schulz, P. Larsson, P. Bjelkmar, R. Apostolov, M. R. Shirts, J. C. Smith, P. M. Kasson, D. van der Spoel, B. Hess and E. Lindahl, *Bioinformatics*, 2013, **29**, 845-854.
20. R. B. Best, G. Hummer and W. A. Eaton, *Proceedings of the National Academy of Sciences of the United States of America*, 2013, **110**, 17874-17879.
21. W. Li, P. G. Wolynes and S. Takada, *Proceedings of the National Academy of Sciences of the United States of America*, 2011, **108**, 3504-3509.
22. Y. Wang, C. Tang, E. Wang and J. Wang, *PLoS computational biology*, 2012, **8**, e1002471.
